# Supplementary material for: Autistic Traits in Doctors: A Cross-sectional Study of Doctors Seeking Mental Health Support
Source: Research Square preprint supplement (doi:10.21203/rs.3.rs-7437542/v1), 2025-09-09
Supplement: Supplementary file 1 [file c09ef4f0de5c8a076f248ba7.docx]

**Supplementary Table 1a: Analysis of Responses to AQ-10 Items Among Psychiatrists**

| **Domain** | **AQ-10 Item** | **Sample Group** | **Screened Positive for Domain** |
| --- | --- | --- | --- |
| Attention to Detail | 1. I often notice small sounds when others do not  2. I usually concentrate more on the whole picture, rather than the  small details | Psychiatrists | 50% |
|  | AQ-10 Positive Psychiatrists | 88% |
| Attention Switching | 3. I find it easy to do more than one thing at once  4. If there is an interruption, I can switch back to what I was doing very quickly | Psychiatrists | 51% |
|  | AQ-10 Positive Psychiatrists | 88% |
| Communication | 5. I find it easy to ‘read between the lines’ when someone is talking to me  6.  I know how to tell if someone listening to me is getting bored | Psychiatrists | 25% |
|  | AQ-10 Positive Psychiatrists | 73% |
| Imagination | 7.  When I’m reading a story, I find it difficult to work out the characters’ intentions  8.  I like to collect information about categories of things (e.g. types of car, types of bird, types of train, types of plant etc) | Psychiatrists | 12% |
|  | AQ-10 Positive Psychiatrists | 35% |
| Social | 9.  I find it easy to work out what someone is thinking or feeling just by looking at their face  10.  I find it difficult to work out people’s intentions | Psychiatrists | 22% |
|  | AQ-10 Positive Psychiatrists | 62% |

**Supplementary Table 1b: Analysis of Responses to AQ-10 Items Among Surgeons**

| **Domain** | **AQ-10 Item** | **Sample Group** | **Screened Positive for Domain** |
| --- | --- | --- | --- |
| Attention to Detail | 1. I often notice small sounds when others do not  2. I usually concentrate more on the whole picture, rather than the  small details | Surgeons | 51% |
|  | AQ-10 Positive Surgeons | 85% |
| Attention Switching | 3. I find it easy to do more than one thing at once  4. If there is an interruption, I can switch back to what I was doing very quickly | Surgeons | 53% |
|  | AQ-10 Positive Surgeons | 85% |
| Communication | 5. I find it easy to ‘read between the lines’ when someone is talking to me  6.  I know how to tell if someone listening to me is getting bored | Surgeons | 28% |
|  | AQ-10 Positive Surgeons | 69% |
| Imagination | 7.  When I’m reading a story, I find it difficult to work out the characters’ intentions  8.  I like to collect information about categories of things (e.g. types of car, types of bird, types of train, types of plant etc) | Surgeons | 20% |
|  | AQ-10 Positive Surgeons | 58% |
| Social | 9.  I find it easy to work out what someone is thinking or feeling just by looking at their face  10.  I find it difficult to work out people’s intentions | Surgeons | 33% |
|  | AQ-10 Positive Surgeons | 65% |
